# Supplementary material for: Tropical wet season runoff mobilises younger carbon in rainforest streams but older carbon in agricultural streams
Source: Copernicus journal article supplement (doi:10.5194/egusphere-2025-1600), 2025-04-10
Supplement: Supplementary file 1 [file egusphere-2025-1600-supplement.pdf]

## Supplementary information for:

### Tropical wet season runoff mobilises younger carbon in rainforest streams but older carbon in agricultural streams

Clément Duvert, Vanessa Solano, Dioni I. Cendón, Francesco Ulloa-Cedamano, Liza K. McDonough, Robert G. M. Spencer, Niels C. Munksgaard, Lindsay B. Hutley, Jean-Sébastien Moquet, David E. Butman

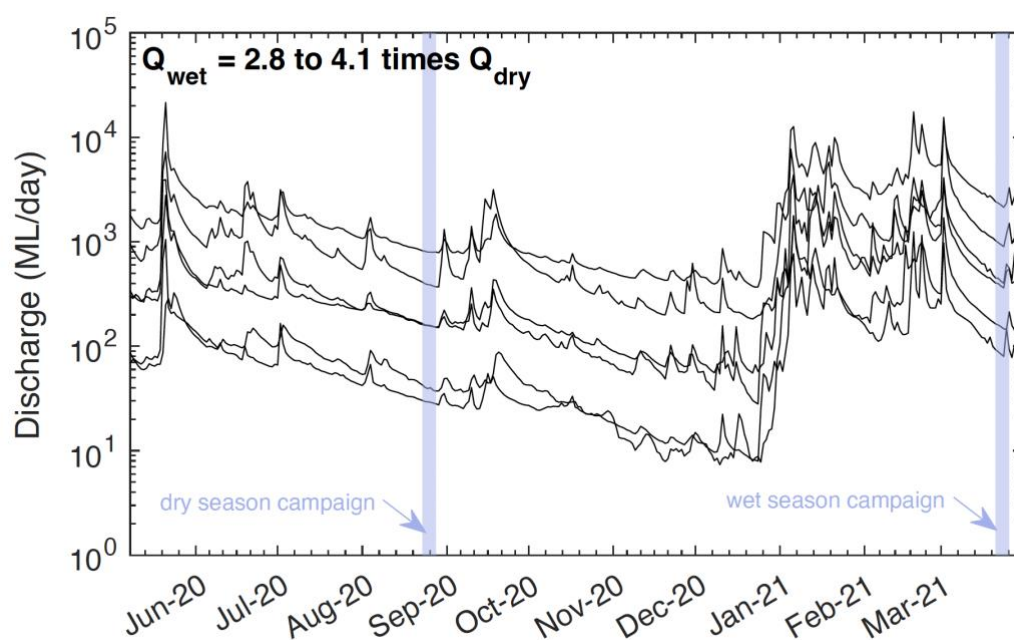

Figure S1. Daily discharge time-series at six gauging stations managed by the Queensland Government and located within the study area (South Johnstone River upstream of Central Mill (112101B); Mulgrave River at the Fisheries (111005A); Liverpool Creek at Upper Japoonvale (112102A); Fisher Creek at Nerada (112002A); Cochable Creek at Powerline (113004A); Millstream at Ravenshoe (116011A)). Mean discharge during the wet season field campaign was on average 3.0 times (min–max 2.8–4.1) higher than mean discharge during the dry season field campaign.

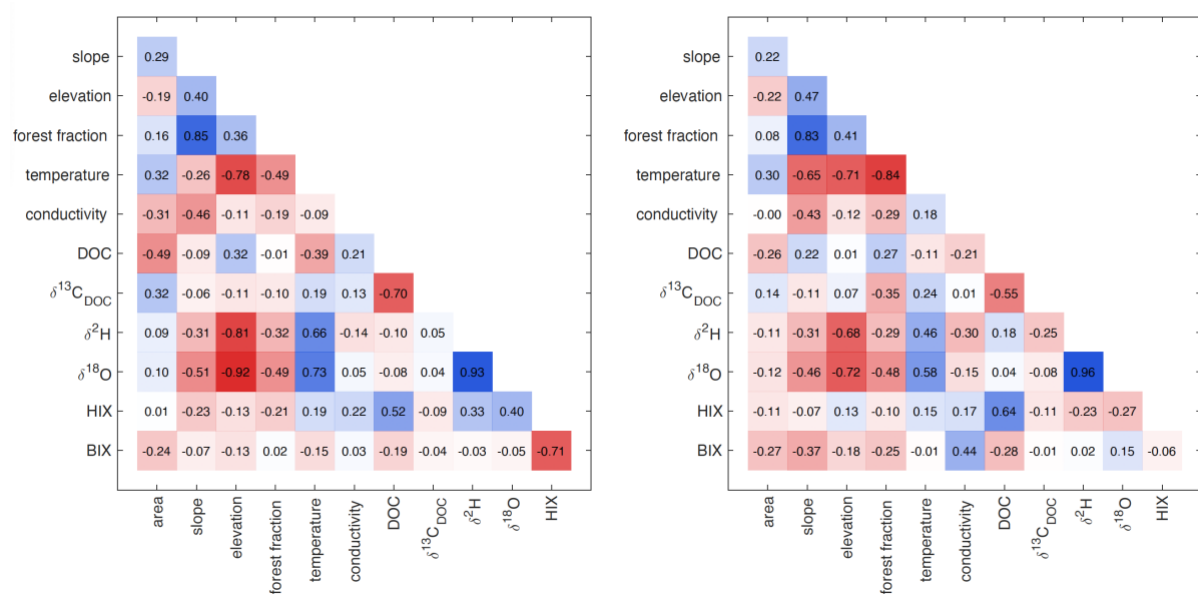

Figure S2. Pearson correlation matrices between all predictors for the dry season (left) and wet season (right) datasets.

Table S1. Statistical differences in environmental variables between the six pasture sites and six cropland sites. P-values are based on Mann-Whitney U tests. Bold values indicate significance at the 95% confidence level.

| Variable                           | p-value<br>(dry) | p-value<br>(wet) |
|------------------------------------|------------------|------------------|
| electrical conductivity            | 0.818            | 0.223            |
| temperature                        | 0.180            | 0.180            |
| $\delta^2\text{H}$                 | <b>0.017</b>     | 0.370            |
| $\delta^{18}\text{O}$              | <b>0.004</b>     | 0.394            |
| DOC                                | 0.900            | 0.589            |
| $\delta^{13}\text{C}_{\text{DOC}}$ | 0.485            | 0.818            |
| pMC-DOC                            | 0.394            | 0.690            |
| HIX                                | 0.937            | 0.662            |
| BIX                                | 0.699            | 0.329            |
| slope                              |                  | 0.310            |
| area                               |                  | 0.818            |
| elevation                          |                  | <b>0.004</b>     |

Table S2. Linear relationships between  $^{14}\text{C}$ -DOC and various environmental variables. The only significant relationship was with DOC concentrations in the wet season (values in bold).

| <b>Predictor</b>                   | <b>R<sup>2</sup><br/>(dry)</b> | <b>p-value<br/>(dry)</b> | <b>R<sup>2</sup><br/>(wet)</b> | <b>p-value<br/>(wet)</b> |
|------------------------------------|--------------------------------|--------------------------|--------------------------------|--------------------------|
| electrical conductivity            | 0.08                           | 0.249                    | 0.05                           | 0.425                    |
| temperature                        | 0.09                           | 0.223                    | 0.04                           | 0.439                    |
| DOC                                | 0.00                           | 0.809                    | <b>0.58</b>                    | <b>0.001</b>             |
| $\delta^{13}\text{C}_{\text{DOC}}$ | 0.00                           | 0.806                    | 0.01                           | 0.665                    |
| $\delta^2\text{H}$                 | 0.07                           | 0.320                    | 0.03                           | 0.513                    |
| slope                              | 0.00                           | 0.819                    | 0.23                           | 0.059                    |
| area                               | 0.03                           | 0.519                    | 0.01                           | 0.720                    |
| elevation                          | 0.11                           | 0.185                    | 0.04                           | 0.473                    |

Table S3. Radiocarbon values for soil organic carbon (SOC) in two soil cores.

| <b>site ID</b> | <b>depth</b> | <b>date</b> | <b><math>^{14}\text{C}</math>-SOC<br/>(pMC)</b> | <b>SOC age (years<br/>BP)</b> |
|----------------|--------------|-------------|-------------------------------------------------|-------------------------------|
| R3             | 0-5cm        | 26/8/2020   | 102.8                                           | Modern                        |
|                | 10-15cm      | 26/8/2020   | 99.1                                            | 76                            |
|                | 20-30cm      | 26/8/2020   | 83.4                                            | 1458                          |
| R6             | 0-5cm        | 27/8/2020   | 106.5                                           | Modern                        |
|                | 10-15cm      | 27/8/2020   | 108.8                                           | Modern                        |
|                | 20-30cm      | 27/8/2020   | 104.6                                           | Modern                        |

Table S4. Coordinates of the 18 stream sampling sites.

| <b>site ID</b> | <b>stream name</b> | <b>latitude</b> | <b>longitude</b> |
|----------------|--------------------|-----------------|------------------|
| C1             | Victory Creek      | -17.48122       | 145.99363        |
| C2             | Mullins Rd Creek   | -17.95959       | 145.84126        |
| C3             | Scheu Creek        | -17.58070       | 146.00357        |
| C4             | Utchee Creek       | -17.64116       | 145.92248        |
| C5             | Mistake Creek      | -17.75285       | 146.01787        |
| C6             | Diggers Creek      | -17.79293       | 146.02380        |
| P1             | Short Creek        | -17.38218       | 145.66591        |
| P2             | Theresa Creek      | -17.48909       | 145.61590        |
| P3             | Tranter Creek      | -17.52930       | 145.60649        |
| P4             | Wadda Creek        | -17.59486       | 145.84216        |
| P5             | Gregory Creek      | -17.59148       | 145.87203        |
| P6             | Mena Creek         | -17.67318       | 145.90815        |
| R1             | Kauri Creek        | -17.13496       | 145.59885        |
| R2             | Boulders Creek     | -17.34134       | 145.86922        |
| R3             | Gooligan Creek     | -17.59765       | 145.75864        |
| R4             | Douglas Creek      | -17.59272       | 145.73322        |
| R5             | Bridge 15 Creek    | -17.74417       | 145.63106        |
| R6             | Coochable Creek    | -17.76864       | 145.65875        |
